# Supplementary material for: Effects of pH and Osmotic Changes on the Metabolic Expressions of Bacillus subtilis Strain 168 in Metabolite Pathways including Leucine Metabolism
Source: MDPI journal article supplement (doi:10.3390/metabo12020112), 2022-01-25
Supplement: s1 [file s1]

Supplementary Material

# Metabolic changes of *Bacillus subtilis* strain 168 according to culture conditions in metabolite pathways including leucine metabolism

Min Kyung Park, Soyeon Lee and Young-Suk Kim

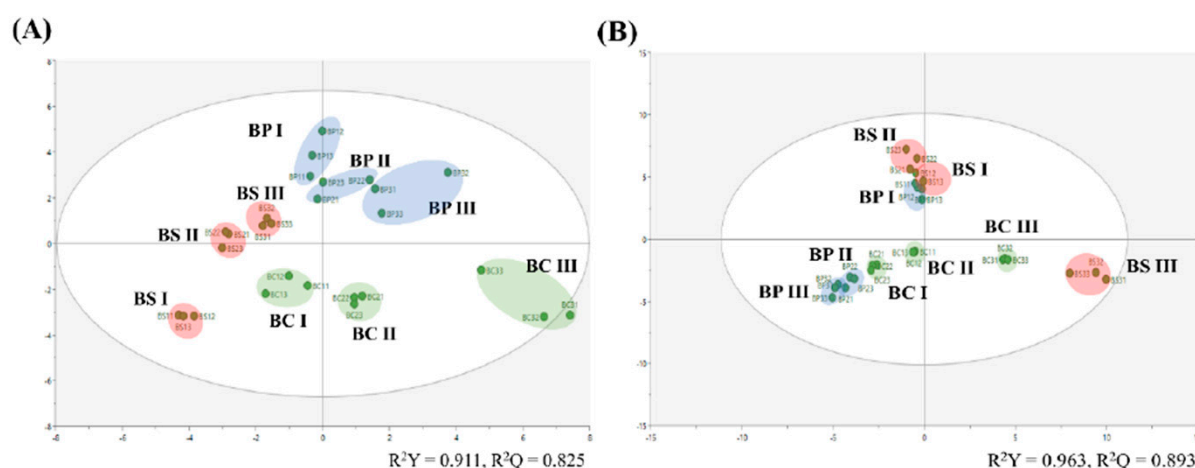

**Figure S1.** PCA score scatter plot of control (BC), alkaline pH (BP), and high salt concentration (BS) groups based on primary metabolite profiles (A) and secondary volatile metabolite profiles (B).

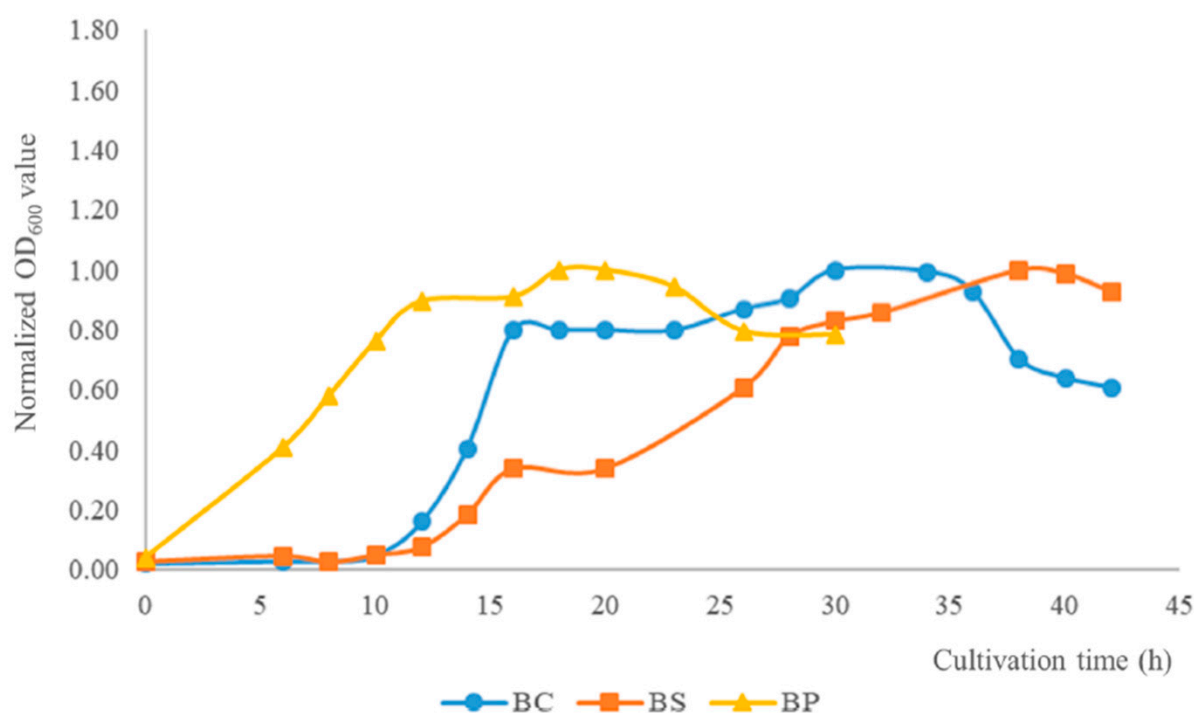

**Figure S2.** Growth curve of *B. subtilis* strain 168 cultivated under different culture conditions according to cultivation time (BC: control; BP: alkaline pH; BS: high salt concentration).

**Table S1.** Main variables contributing to discrimination between primary and secondary volatile metabolic profiles of *B. subtilis* fermentations.

| No          | Metabolite                                    | VIP  | Z score values |       |        |       |       |        |       |       |        | Possible related metabolism |  |
|-------------|-----------------------------------------------|------|----------------|-------|--------|-------|-------|--------|-------|-------|--------|-----------------------------|--|
|             |                                               |      | BC I           | BC II | BC III | BP I  | BP II | BP III | BS I  | BS II | BS III |                             |  |
| BP-specific |                                               |      |                |       |        |       |       |        |       |       |        |                             |  |
| C2          | Fructose                                      | 1.14 | 0.14           | −0.36 | −0.62  | 0.26  | 0.03  | 2.58   | −0.6  | −0.66 | −0.76  | Carbohydrate metabolism     |  |
| C4          | Galactose                                     | 1.36 | 0.53           | 0.31  | −0.08  | −0.69 | −0.4  | 2.4    | −0.69 | −0.69 | −0.69  | Carbohydrate metabolism     |  |
| A1          | Alanine                                       | 1.07 | −0.89          | 0.57  | 0.71   | 0.36  | 1.29  | 0.92   | −1.65 | −0.31 | −1.01  | Amino acid metabolism       |  |
| A4          | Isoleucine                                    | 1.16 | −0.69          | −0.44 | 0.46   | 0.08  | 0.79  | 2.12   | −1.22 | −0.7  | −0.41  | Amino acid metabolism       |  |
| A14         | Phenylalanine                                 | 1.36 | −0.46          | −0.76 | 0.48   | −0.13 | 0.92  | 1.51   | −1.4  | −0.86 | 0.72   | Amino acid metabolism       |  |
| v48         | Phenylmethanol                                | 1.28 | −0.6           | −0.6  | −0.6   | 0.13  | 1.56  | 1.93   | −0.6  | −0.6  | −0.6   | Amino acid metabolism       |  |
| v12         | 3-Methylbutyl acetate                         | 1.16 | −0.52          | −0.52 | −0.52  | 1.88  | 1.78  | −0.52  | −0.52 | −0.52 | −0.52  | Amino acid metabolism       |  |
| v33         | Undecan−2-one                                 | 1.17 | −0.52          | −0.52 | −0.52  | −0.52 | 2     | 1.64   | −0.52 | −0.52 | −0.52  | Fatty acid metabolism       |  |
| v43         | 6-Methyloxan-2-one                            | 1.16 | −0.52          | −0.52 | −0.52  | −0.52 | 1.88  | 1.74   | −0.52 | −0.52 | −0.52  | Fatty acid metabolism       |  |
| v19         | Nonan−2-one                                   | 1.15 | −0.51          | −0.51 | −0.51  | −0.51 | 1.94  | 1.66   | −0.51 | −0.51 | −0.51  | Fatty acid metabolism       |  |
| v41         | Undecan-2-ol                                  | 1.13 | −0.5           | −0.5  | −0.5   | −0.5  | 1.28  | 2.25   | −0.5  | −0.5  | −0.5   | Fatty acid metabolism       |  |
| BS-specific |                                               |      |                |       |        |       |       |        |       |       |        |                             |  |
| v37         | Furan-2-ylmethanol                            | 1.33 | −0.86          | −0.86 | −0.86  | −0.16 | 0.14  | −0.86  | 0.81  | 0.73  | 1.93   | Carbohydrate metabolism     |  |
| v32         | Cyclopent-4-ene-1,3-dione                     | 1.13 | −0.62          | −0.62 | −0.62  | 0.33  | −0.62 | −0.62  | 1.66  | 1.72  | −0.62  | Carbohydrate metabolism     |  |
| v56         | 3,5-Dihydroxy-6-methyl-2,3-dihydropyran-4-one | 1.09 | −0.79          | −0.3  | −0.79  | −0.13 | 0.22  | −0.79  | 1.88  | 1.48  | −0.79  | Carbohydrate metabolism     |  |
| v55         | 4-Hydroxy-2,5-dimethylfuran-3-one             | 1.11 | −0.67          | −0.67 | −0.67  | 0.95  | −0.67 | −0.67  | 1.75  | 1.34  | −0.67  | Carbohydrate metabolism     |  |
| A5          | Proline                                       | 1.16 | −0.62          | −0.02 | −0.35  | −0.62 | −0.64 | −0.57  | −0.68 | 1.27  | 2.22   | Amino acid metabolism       |  |
| A15         | Ornithine                                     | 1.07 | 0.61           | −0.63 | 0.12   | −0.76 | −0.6  | −0.74  | −0.97 | 0.92  | 2.05   | Amino acid metabolism       |  |
| v35         | 1-Phenylethanone                              | 1.07 | −0.67          | −0.67 | −0.67  | 1.07  | −0.67 | −0.67  | 1.03  | 1.9   | −0.67  | Amino acid metabolism       |  |
| v45         | 4-Methylpentanoicacid                         | 1.15 | −0.5           | −0.5  | −0.5   | −0.5  | −0.5  | −0.5   | 1.22  | 2.28  | −0.5   | Fatty acid metabolism       |  |
| v26         | 2-Ethylhexan−1-ol                             | 1.11 | −1.59          | −0.31 | 0.23   | 0.56  | −0.9  | −0.93  | 1.45  | 0.64  | 0.85   | Fatty acid metabolism       |  |
| v34         | Butanoic acid                                 | 1.00 | 0.05           | −0.18 | −1.05  | 0.01  | −0.73 | −0.56  | −0.25 | 0.2   | 2.49   | Fatty acid metabolism       |  |
| v11         | Butyl acetate                                 | 1.08 | −0.6           | −0.6  | −0.6   | −0.2  | 0.12  | −0.6   | −0.19 | 0.08  | 2.6    | Fatty acid metabolism       |  |
| v35         | 1-Phenylethanone                              | 1.07 | −0.67          | −0.67 | −0.67  | 1.07  | −0.67 | −0.67  | 1.03  | 1.9   | −0.67  | Amino acid metabolism       |  |
| v45         | 4-Methylpentanoicacid                         | 1.15 | −0.5           | −0.5  | −0.5   | −0.5  | −0.5  | −0.5   | 1.22  | 2.28  | −0.5   | Fatty acid metabolism       |  |
| v26         | 2-Ethylhexan-1-ol                             | 1.11 | −1.59          | −0.31 | 0.23   | 0.56  | −0.9  | −0.93  | 1.45  | 0.64  | 0.85   | Fatty acid metabolism       |  |

|     |               |      |      |       |       |      |       |       |       |      |      |                       |
|-----|---------------|------|------|-------|-------|------|-------|-------|-------|------|------|-----------------------|
| v34 | Butanoic acid | 1.00 | 0.05 | −0.18 | −1.05 | 0.01 | −0.73 | −0.56 | −0.25 | 0.2  | 2.49 | Fatty acid metabolism |
| v11 | Butyl acetate | 1.08 | −0.6 | −0.6  | −0.6  | −0.2 | 0.12  | −0.6  | −0.19 | 0.08 | 2.6  | Fatty acid metabolism |

BC: control sample.

BP: cultivation under alkaline pH (pH 8).

BS: cultivation under high salt concentration (1 M salt concentration).

**Table S2.** Metabolites contributing to significant metabolic changes in metabolic pathways of *B. subtilis*.

| Metabolite                            | Relative contents (average) |       |        | Fold change |       | Metabolite                                        | Relative contents (average) |       |                       | Fold change |       |
|---------------------------------------|-----------------------------|-------|--------|-------------|-------|---------------------------------------------------|-----------------------------|-------|-----------------------|-------------|-------|
|                                       | BC                          | BP    | BS     | BP          | BS    |                                                   | BC                          | BP    | BS                    | BP          | BS    |
| <b>Primary metabolites</b>            |                             |       |        |             |       | <b>Secondary volatile metabolites</b>             |                             |       |                       |             |       |
| Leucine                               | 1.399                       | 8.985 | 1.854  | 0.81        | 0.12  | Acetaldehyde                                      | 14.466                      | 1.682 | 24.483                | −0.93       | 0.23  |
| Proline                               | 1.873                       | 0.819 | 14.299 | −0.36       | 0.88  | Propan-2-one                                      | 2.48                        | 0.614 | 2.913                 | −0.61       | 0.07  |
| Methionine                            | 0.001                       | 0.043 | 0.008  | 1.63        | 0.92  | Ethyl 3-methylbutanoate                           | 11.41                       | 2.502 | 10.012                | −0.66       | −0.06 |
| Aspartic acid                         | 0.581                       | 0.122 | 0.121  | −0.68       | −0.68 | Butyl acetate                                     | NDa                         | ND    | 5.79                  | UCb         | NeDc  |
| Ornithine                             | 0.113                       | 0.024 | 0.314  | −0.67       | 0.44  | Methyl acetate                                    | ND                          | 0.318 | ND                    | NeD         | UC    |
| Glutamine                             | 5.402                       | 2.855 | 0.695  | −0.28       | −0.89 | Nonan-2-one                                       | ND                          | 1.061 | ND                    | NeD         | UC    |
| Glutamic acid                         | 5.405                       | 2.853 | 0.685  | −0.28       | −0.9  | 2,3,5-Trimethylpyrazine                           | ND                          | ND    | 0.163                 | UC          | NeD   |
| Citrulline                            | 0.035                       | 0.001 | 0.001  | −1.54       | −1.54 | Decan-2-one                                       | ND                          | 0.567 | ND                    | NeD         | UC    |
| Cadaverine                            | 0.025                       | 0.001 | 0.001  | −1.4        | −1.4  | 4-Methyl-2-oxovaleric acid                        | 2.391                       | 0.288 | 1.478                 | −0.92       | −0.21 |
| Lactic acid                           | 2.059                       | 0.513 | 0.978  | −0.6        | −0.32 | Furan-2-carbaldehyde                              | 0.112                       | 0.125 | 0.571                 | 0.05        | 0.71  |
| Fumaric acid                          | 0.103                       | 0.176 | 0.524  | 0.23        | 0.71  | 2,3,5,6-Tetramethylpyrazine                       | 0.751                       | ND    | ND                    | ND          | ND    |
| Phosphoric acid                       | 0.063                       | 0.042 | 0.001  | −0.18       | −1.8  | 3-Methyl-1H-pyrrole                               | ND                          | ND    | 0.738                 | UC          | NeD   |
| Malic acid                            | 0.042                       | 0.584 | 0.111  | 1.15        | 0.42  | Ethyl acetate                                     | 1.491                       | 1.132 | 6.48                  | −0.12       | 0.64  |
| Succinic acid                         | 1.464                       | 1.691 | 5.184  | 0.21        | 1.82  | Propanoic acid                                    | ND                          | 0.429 | ND                    | NeD         | UC    |
| Fructose                              | 0.074                       | 1.364 | 0.013  | 1.27        | −0.74 | Undecan-2-one                                     | ND                          | 0.52  | ND                    | NeD         | UC    |
| Galactose                             | 0.046                       | 0.694 | 0.007  | 1.18        | −0.84 | Butanoic acid                                     | ND                          | 0.574 | 4.161                 | NeD         | NeD   |
| Glucose                               | 0.013                       | 0.067 | 0.001  | 0.7         | −1.12 | Dodecan-2-one                                     | ND                          | 1.745 | ND                    | NeD         | UC    |
| Maltose                               | 0.019                       | 0.053 | 0.119  | 0.45        | 0.81  | Tridecan-2-ol                                     | ND                          | 1.053 | ND                    | NeD         | NC    |
| Sucrose                               | 0.053                       | 0.019 | 0.119  | −1.48       | 1.17  | 4-Methylpentan-2-one                              | ND                          | 0.151 | ND                    | NeD         | NC    |
| <b>Secondary volatile metabolites</b> |                             |       |        |             |       | <b>Secondary volatile metabolites</b>             |                             |       |                       |             |       |
| Furan-2-ylmethanol                    | ND                          | ND    | 0.183  | NC          | NeD   | Tetradecan-2-ol                                   | ND                          | 3.328 | Furan-2-ylmethanol    | ND          | ND    |
| But-2-enoic acid                      | ND                          | 0.218 | ND     | NeD         | NC    | 2-(2-hydroxyethoxy)-Ethanol                       | 3.507                       | ND    | But-2-enoic acid      | ND          | 0.218 |
| Undecan-2-ol                          | ND                          | 0.412 | ND     | NeD         | NC    | Phenol                                            | 2.326                       | 0.405 | Undecan-2-ol          | ND          | 0.412 |
| Ethyl 2-phenylacetate                 | ND                          | 1.017 | 1.287  | NeD         | NeD   | (2E,6E)-3,7,11-Trimethyl-dodeca-2,6,10-trien-1-ol | ND                          | 1.081 | Ethyl 2-phenylacetate | ND          | 1.017 |
| 6-Methyloxan-2-one                    | ND                          | 0.17  | ND     | NeD         | NC    | Octadecanoic acid                                 | ND                          | 4.81  | 6-Methyloxan-2-one    | ND          | 0.17  |
| Tridecan-2-one                        | ND                          | 1.041 | ND     | NeD         | NC    | Tetradecanoic acid                                | 2.475                       | ND    | Tridecan-2-one        | ND          | 1.041 |

|                                |       |       |       |       |      |                                                   |        |       |                       |       |       |
|--------------------------------|-------|-------|-------|-------|------|---------------------------------------------------|--------|-------|-----------------------|-------|-------|
| Tetradecan-2-one               | ND    | 2.173 | ND    | NeD   | NC   | Ethyl 2-methylpropanoate                          | 13.776 | 2.105 | Tetradecan-2-one      | ND    | 2.173 |
| Phenylmethanol                 | ND    | 1.431 | ND    | NeD   | NC   | Hexadecanoic acid                                 | 25.485 | 14.58 | Phenylmethanol        | ND    | 1.431 |
| 2-Phenylethanol                | 2.215 | 0.321 | 2.25  | −0.84 | 0.01 | Butane-2,3-dione                                  | 23.422 | 2.455 | 2-Phenylethanol       | 2.215 | 0.321 |
| Secondary volatile metabolites |       |       |       |       |      | 4-Methylpentan-2-one                              | ND     | 0.151 |                       |       |       |
|                                |       |       |       |       |      |                                                   |        |       |                       |       |       |
|                                |       |       |       |       |      |                                                   |        |       |                       |       |       |
|                                |       |       |       |       |      |                                                   |        |       |                       |       |       |
|                                |       |       |       |       |      |                                                   |        |       |                       |       |       |
|                                |       |       |       |       |      |                                                   |        |       |                       |       |       |
|                                |       |       |       |       |      |                                                   |        |       |                       |       |       |
|                                |       |       |       |       |      |                                                   |        |       |                       |       |       |
|                                |       |       |       |       |      |                                                   |        |       |                       |       |       |
|                                |       |       |       |       |      |                                                   |        |       |                       |       |       |
| Furan-2-ylmethanol             | ND    | ND    | 0.183 | NC    | NeD  | Tetradecan-2-ol                                   | ND     | 3.328 | Furan-2-ylmethanol    | ND    | ND    |
| But-2-enoic acid               | ND    | 0.218 | ND    | NeD   | NC   | 2-(2-hydroxyethoxy)-Ethanol                       | 3.507  | ND    | But-2-enoic acid      | ND    | 0.218 |
| Undecan-2-ol                   | ND    | 0.412 | ND    | NeD   | NC   | Phenol                                            | 2.326  | 0.405 | Undecan-2-ol          | ND    | 0.412 |
| Ethyl 2-phenylacetate          | ND    | 1.017 | 1.287 | NeD   | NeD  | (2E,6E)-3,7,11-Trimethyl-dodeca-2,6,10-trien-1-ol | ND     | 1.081 | Ethyl 2-phenylacetate | ND    | 1.017 |
| 6-Methyloxan-2-one             | ND    | 0.17  | ND    | NeD   | NC   | Octadecanoic acid                                 | ND     | 4.81  | 6-Methyloxan-2-one    | ND    | 0.17  |
| Tridecan-2-one                 | ND    | 1.041 | ND    | NeD   | NC   | Tetradecanoic acid                                | 2.475  | ND    | Tridecan-2-one        | ND    | 1.041 |
| Tetradecan-2-one               | ND    | 2.173 | ND    | NeD   | NC   | Ethyl 2-methylpropanoate                          | 13.776 | 2.105 | Tetradecan-2-one      | ND    | 2.173 |
| Phenylmethanol                 | ND    | 1.431 | ND    | NeD   | NC   | Hexadecanoic acid                                 | 25.485 | 14.58 | Phenylmethanol        | ND    | 1.431 |
| 2-Phenylethanol                | 2.215 | 0.321 | 2.25  | −0.84 | 0.01 | Butane-2,3-dione                                  | 23.422 | 2.455 | 2-Phenylethanol       | 2.215 | 0.321 |
| Secondary volatile metabolites |       |       |       |       |      | 4-Methylpentan-2-one                              | ND     | 0.151 |                       |       |       |
|                                |       |       |       |       |      |                                                   |        |       |                       |       |       |
|                                |       |       |       |       |      |                                                   |        |       |                       |       |       |
|                                |       |       |       |       |      |                                                   |        |       |                       |       |       |
|                                |       |       |       |       |      |                                                   |        |       |                       |       |       |
|                                |       |       |       |       |      |                                                   |        |       |                       |       |       |
|                                |       |       |       |       |      |                                                   |        |       |                       |       |       |
|                                |       |       |       |       |      |                                                   |        |       |                       |       |       |
|                                |       |       |       |       |      |                                                   |        |       |                       |       |       |
|                                |       |       |       |       |      |                                                   |        |       |                       |       |       |
| Furan-2-ylmethanol             | ND    | ND    | 0.183 | NC    | NeD  | Tetradecan-2-ol                                   | ND     | 3.328 | Furan-2-ylmethanol    | ND    | ND    |
| But-2-enoic acid               | ND    | 0.218 | ND    | NeD   | NC   | 2-(2-hydroxyethoxy)-Ethanol                       | 3.507  | ND    | But-2-enoic acid      | ND    | 0.218 |
| Undecan-2-ol                   | ND    | 0.412 | ND    | NeD   | NC   | Phenol                                            | 2.326  | 0.405 | Undecan-2-ol          | ND    | 0.412 |
| Ethyl 2-phenylacetate          | ND    | 1.017 | 1.287 | NeD   | NeD  | (2E,6E)-3,7,11-Trimethyl-dodeca-2,6,10-trien-1-ol | ND     | 1.081 | Ethyl 2-phenylacetate | ND    | 1.017 |
| 6-Methyloxan-2-one             | ND    | 0.17  | ND    | NeD   | NC   | Octadecanoic acid                                 | ND     | 4.81  | 6-Methyloxan-2-one    | ND    | 0.17  |
| Tridecan-2-one                 | ND    | 1.041 | ND    | NeD   | NC   | Tetradecanoic acid                                | 2.475  | ND    | Tridecan-2-one        | ND    | 1.041 |
| Tetradecan-2-one               | ND    | 2.173 | ND    | NeD   | NC   | Ethyl 2-methylpropanoate                          | 13.776 | 2.105 | Tetradecan-2-one      | ND    | 2.173 |

|                 |       |       |      |       |      |                   |        |       |                 |       |       |
|-----------------|-------|-------|------|-------|------|-------------------|--------|-------|-----------------|-------|-------|
| Phenylmethanol  | ND    | 1.431 | ND   | NeD   | NC   | Hexadecanoic acid | 25.485 | 14.58 | Phenylmethanol  | ND    | 1.431 |
| 2-Phenylethanol | 2.215 | 0.321 | 2.25 | −0.84 | 0.01 | Butane-2,3-dione  | 23.422 | 2.455 | 2-Phenylethanol | 2.215 | 0.321 |

(BC: control; BP: alkaline pH; BS: high salt concentration).

<sup>a</sup> Not detected.

<sup>b</sup> Unchanged metabolite compared with BC (control).

<sup>c</sup> Newly detected metabolite compared with BC.

**Table S3.** The changes of metabolites derived from leucine according to culture conditions, such as alkaline pH and temperature.

| Metabolite                  | Z-score |       |        |       |       |        |       |       |        |
|-----------------------------|---------|-------|--------|-------|-------|--------|-------|-------|--------|
|                             | BC I    | BC II | BC III | BP I  | BP II | BP III | BS I  | BS II | BS III |
| <b>Time-dependent</b>       |         |       |        |       |       |        |       |       |        |
| Leucine                     | −0.61   | −0.72 | 1.32   | 1.24  | −0.71 | −0.53  | −1.32 | 0.69  | 0.62   |
| Ketoisocaproate             | −0.81   | −0.51 | 1.31   | −1.32 | 0.72  | 0.60   | −0.92 | −0.29 | 1.21   |
| 3-Methylbutanal             | −0.72   | −0.23 | 0.95   | −0.28 | 1.21  | −0.93  | −0.71 | −0.55 | 1.26   |
| 3-Methylbutanol             | 0.14    | 1.07  | −1.2   | −0.93 | 1.11  | −0.18  | −0.66 | 0.81  | −0.15  |
| 3-Methylbutanoic acid       | −0.66   | 1.28  | −0.62  | −1.27 | 0.50  | 0.77   | −1.26 | 0.51  | 0.75   |
| Ethyl 3-methylbutanoate     | −1.24   | 0.94  | 0.31   | −1.27 | 0.29  | 0.97   | −0.81 | −0.49 | 1.30   |
| 3-Methylbutylacetate        | 0.00    | 0.00  | 0.00   | 0.70  | 0.62  | −1.32  | 0.00  | 0.00  | 0.00   |
| <b>Conditions-dependent</b> |         |       |        |       |       |        |       |       |        |
| Leucine                     | −0.40   | −0.56 | 2.56   | 0.56  | −0.52 | −0.42  | −0.77 | −0.22 | −0.24  |
| Ketoisocaproate             | −0.47   | −0.08 | 2.27   | −1.05 | −0.63 | −0.65  | −0.4  | 0.01  | 1.00   |
| 3-Methylbutanal             | −0.20   | 0.00  | 0.48   | −0.97 | −0.29 | −1.26  | −0.1  | 0.09  | 2.26   |
| 3-Methylbutanol             | 0.52    | 1.72  | −1.21  | −1.29 | 0.04  | −0.81  | −0.05 | 0.83  | 0.25   |
| 3-Methylbutanoic acid       | −0.48   | 1.02  | −0.45  | −0.86 | 1.29  | 1.61   | −1.11 | −0.55 | −0.48  |
| Ethyl 3-methylbutanoate     | 0.39    | 1.57  | 1.23   | −1.03 | −0.73 | −0.6   | −1.03 | −0.73 | 0.94   |
| 3-Methylbutylacetate        | −0.52   | −0.52 | −0.52  | 1.88  | 1.78  | −0.52  | −0.52 | −0.52 | −0.52  |

(BC: control; BP: alkaline pH; BS: high salt concentration).
